# Supplementary material for: Effect of gold nanoparticles on extracellular nutrient-cycling enzyme activity and bacterial community in soil slurries: role of nanoparticle size and surface coating
Source: Royal Society of Chemistry journal article supplement (doi:10.1039/c6en00567e), 2017-01-01
Supplement: c6en00567e1.pdf [file c6en00567e1.pdf]

## Supporting Information

# Effect of Gold Nanoparticles on Extracellular Nutrient-Cycling Enzyme Activity and Bacterial Community in Soil Slurries: Role of Nanoparticle Size and Surface Coating

BAHAREH ASADISHAD, SHAWNINDER CHAHAL, VANESSA CIANCIARELLI,  
KEVIN ZHOU, AND NATHALIE TUFENKJI<sup>1\*</sup>

Department of Chemical Engineering, McGill University, Montreal, Quebec H3A 0C5, Canada

---

\* Corresponding Author. Phone: (514) 398-2999; Fax: (514) 398-6678; E-mail:  
nathalie.tufenkji@mcgill.ca

## Materials and Methods

**Extracellular Enzyme Assay.** The activities of five extracellular enzymes, cellobiohydrolase (CBH),  $\beta$ -1,4-xylosidase (XYL),  $\beta$ -1,4-glucosidase (GLU),  $\beta$ -1,4-N-acetylglucosaminidase (AGA), and acid phosphatase (AP), were determined using 4-methylumbelliferyl-linked (MUB) substrates and MUB as a standard (Table S1). Substrates and standard were obtained from Sigma-Aldrich and used as received.

5 mM and 30 mM stock solutions of MUB and MUB-linked substrates were prepared using dimethylsulfoxide (DMSO) and stored in the dark at 4°C for up to two months. Stock solutions of 80 mM sodium acetate buffer were prepared in DI water and adjusted to pH 5.1. Since enzyme activity is pH sensitive; the pH of the buffer was adjusted to the mean soil pH of the study site in CaCl<sub>2</sub> (i.e., pH 5.6) within 0.5 units.<sup>1</sup> Working solutions of MUB substrates (200  $\mu$ M) and MUB standard (10  $\mu$ M) were prepared in buffer solution. Working solutions and buffer solutions were stored in the dark at 4°C for up to two weeks.

Extracellular enzyme activities were determined by fluorogenic substrate methods.<sup>1-2</sup> Briefly, 4 mL of soil slurries (containing 2 g of soil) were added to 125 mL of sodium acetate buffer. These slurries were then homogenized by magnetic stirring for 2 h and added to a black polystyrene 96-well microplate. Substrates and standard were added and enzyme activities were determined after 2 h incubation in the dark using a multi-well plate reader (Tecan Infinite m200) with 365 nm excitation and 450 nm emission settings. The main advantage of using fluorometrically-labeled substrates is that product formation can be measured directly in the microplate without extraction and purification of the product.<sup>3</sup> Each well was supplemented with 10  $\mu$ L NaOH (1 mol L<sup>-1</sup>) within 1 min before

measurement to amplify the fluorescence.<sup>2</sup> These assays were performed at 2 h and 30 d after treatment with nAu suspensions. The enzyme activities are expressed as nmol MUB g soil<sup>-1</sup> h<sup>-1</sup>.

**Table S1.** Soil enzymes assayed in this study.

| Enzyme                               | Abbreviation | EC          | Substrate                                       |
|--------------------------------------|--------------|-------------|-------------------------------------------------|
| Acid phosphatase                     | AP           | EC 3.3.3.1  | 4-MUB-phosphate                                 |
| $\beta$ -1,4-glucosidase             | GLU          | EC 3.2.1.21 | 4-MUB- $\beta$ -D-glucoside                     |
| Cellobiohydrolase                    | CBH          | EC 3.2.1.91 | 4-MUB- $\beta$ -D-cellobioside                  |
| $\beta$ -1,4-N-acetylglucosaminidase | AGA          | EC 3.2.1.14 | 4-MUB-N-acetyl- $\beta$ -D-glucosaminide        |
| $\beta$ -1,4-xylosidase              | XYL          | EC 3.2.1.37 | 4-Methylumbelliferyl- $\beta$ -D-xylopyranoside |

EC: enzyme commission classification; MUB: methylumbelliferyl

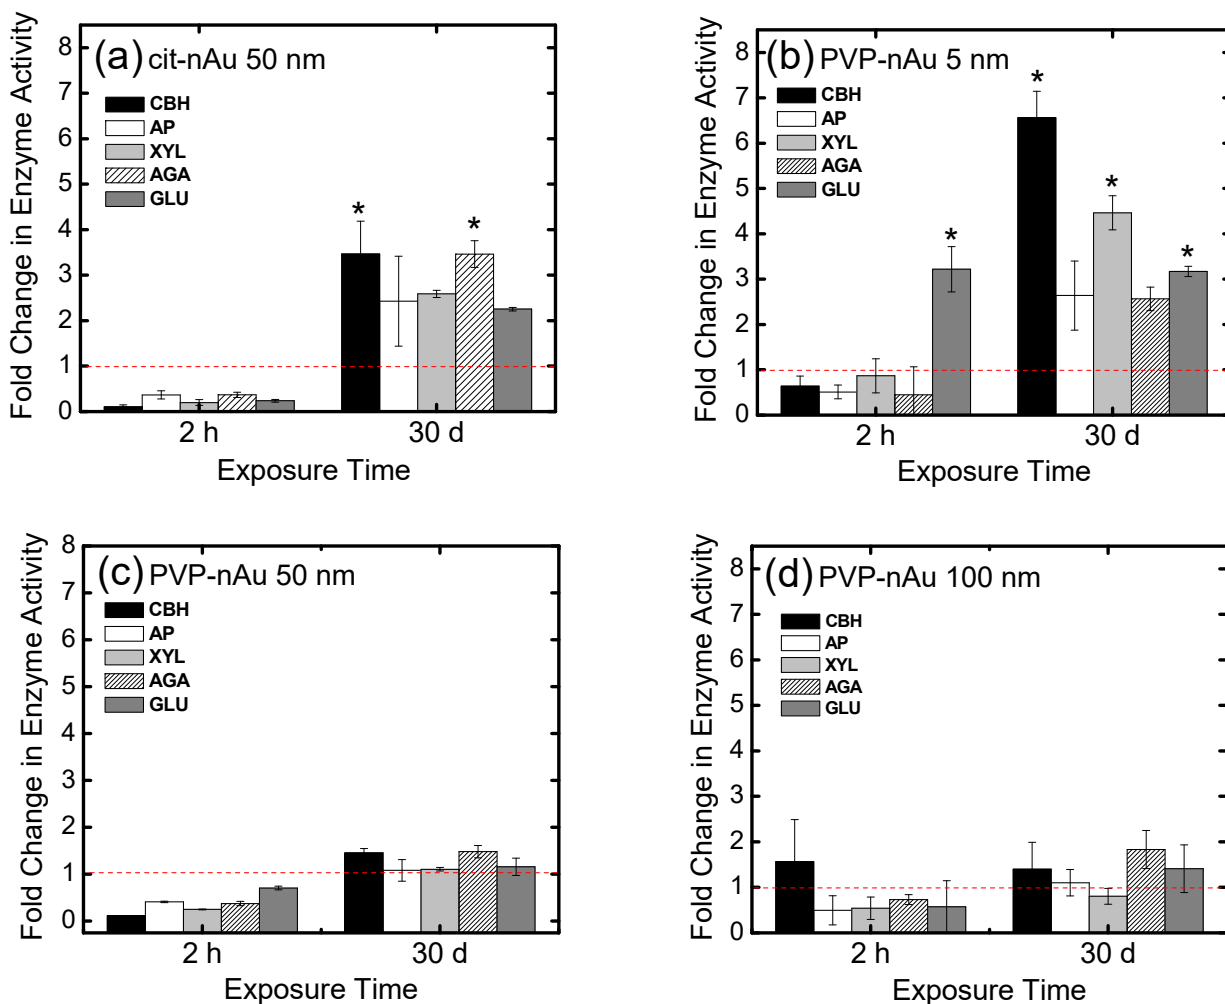

**Figure S1.** Extracellular enzyme activities in soils treated with 0.1 mg kg<sup>-1</sup> soil of (a) 50 nm cit-nAu; (b) 5 nm PVP-nAu; (c) 50 nm PVP-nAu; and (d) 100 nm PVP-nAu determined at 2 h and 30 d of exposure. The enzyme activities of treated samples were normalized to those of the control at each time point and reported as a fold change in enzyme activity. Error bars indicate one standard deviation of means (n=4). Symbols above a bar indicate a statistically significant difference in measured values when compared to the control (determined using two-way ANOVA, \*: p<0.05).

## References

1. Saiya-Cork, K. R.; Sinsabaugh, R. L.; Zak, D. R., The effects of long term nitrogen deposition on extracellular enzyme activity in an *Acer saccharum* forest soil. *Soil Biology and Biochemistry* **2002**, *34* (9), 1309-1315.
2. DeForest, J. L., The influence of time, storage temperature, and substrate age on potential soil enzyme activity in acidic forest soils using MUB-linked substrates and l-DOPA. *Soil Biology and Biochemistry* **2009**, *41* (6), 1180-1186.
3. Marx, M. C.; Wood, M.; Jarvis, S. C., A microplate fluorimetric assay for the study of enzyme diversity in soils. *Soil Biology and Biochemistry* **2001**, *33* (12–13), 1633-1640.
